# Supplementary material for: Rap1, Canoe and Mbt cooperate with Bazooka to promote zonula adherens assembly in the fly photoreceptor
Source: PubMed Central journal article supplement (PMC5897711; doi:10.1242/jcs.207779), 2018-03-15
Supplement: joces-131-207779-s1.pdf [file joces-131-207779-s1.pdf]

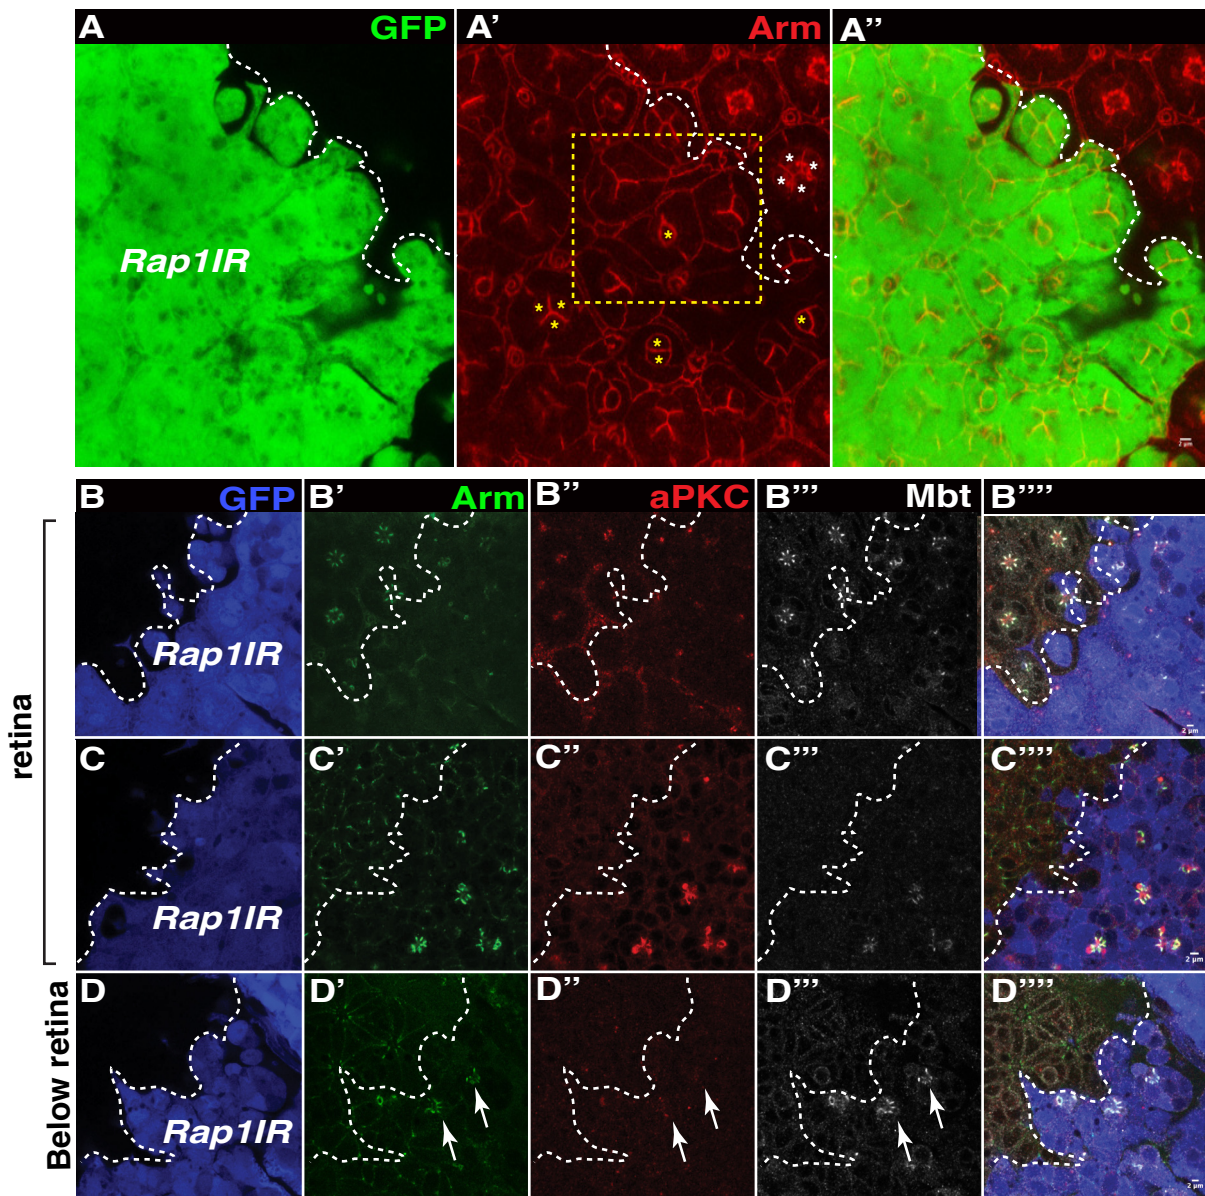

**Supplementary Figure 1: Rap1 is required to preserve retinal tissue integrity.** (A-A'') *Rap1IR* cells positively labeled by GFP (A) and stained for Arm (A'). Yellow stars label cone cells in the *Rap1IR* tissue. White stars label cone cells in one wild type ommatidium. Note the *Rap1IR* ommatidia lack cone cells. A yellow dashed box highlights *Rap1IR* ommatidia lacking interommatidial cells. (B-D) *Rap1IR* cells positively labeled by GFP (blue, (B, C and D)) and stained for Arm (B', C', D'), aPKC (B'', C'', D'') and Mbt (B''', C''', D'''). Note that many *Rap1IR* photoreceptors delaminate below the floor of the retina, indicated by white arrows (D-D'''). Scale bars = 2µm.

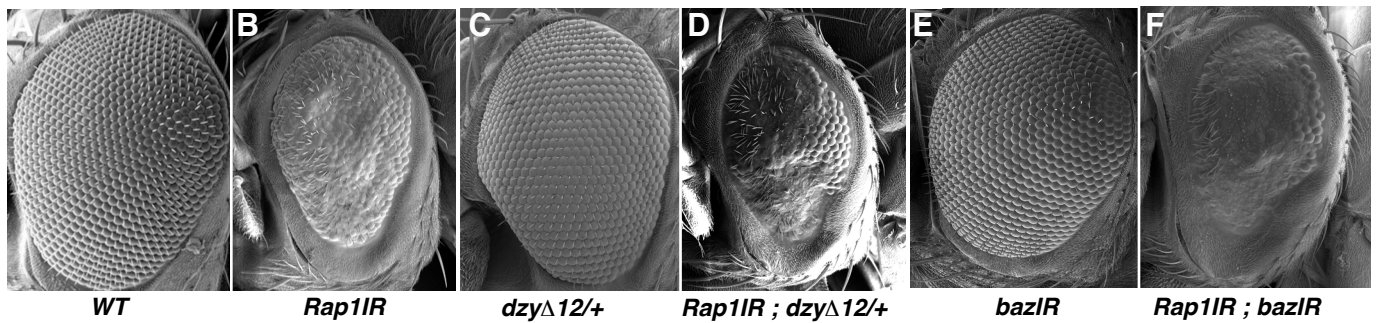

**Supplementary Figure 2: Genetic modifiers of the *Rap1IR* rough eye phenotype.** (A) SEM of a wild type eye, (B) *Rap1IR*, (C) Heterozygous *dzy*<sup>12</sup> eye, (D) *Rap1IR* combined with *dzy*<sup>12</sup> / +, (E) *bazIR*, (F) *bazIR* combined with *Rap1IR*.

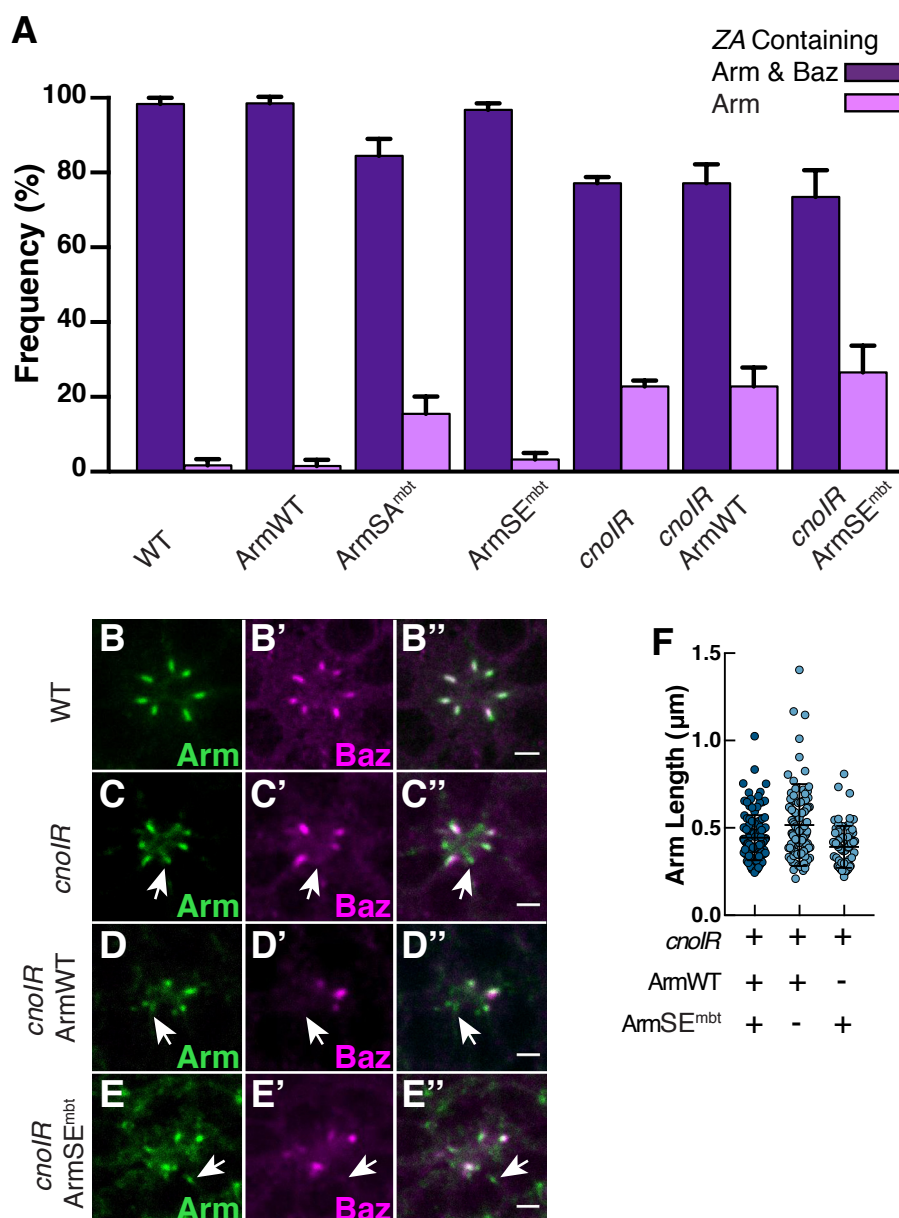

**Supplementary Figure 3: Expression of ArmSE<sup>mbt</sup> fails to rescue junction length and Baz retention in *cnoIR* photoreceptors**

(A) Quantification of the percentage of photoreceptor ZA that contain both Arm and Baz (dark purple) or containing Arm but depleted for Baz (light purple). (B-E'') WT (B-B''), *cnoIR* (C-C''), *cnoIR* co-expressing ArmWT (D-D'') or *cnoIR* co-expressing ArmSE<sup>mbt</sup> (E-E'') retina, stained for Arm (B, C, D, E) and Baz (B', C', D' and E'). White arrows indicate ZA that contain Arm but are depleted for Baz. Scale bars = 2μm. (F) Quantification of Arm domain length at the ZA in *cnoIR* photoreceptors and *cnoIR* photoreceptors expressing ArmWT or ArmSE<sup>mbt</sup>.

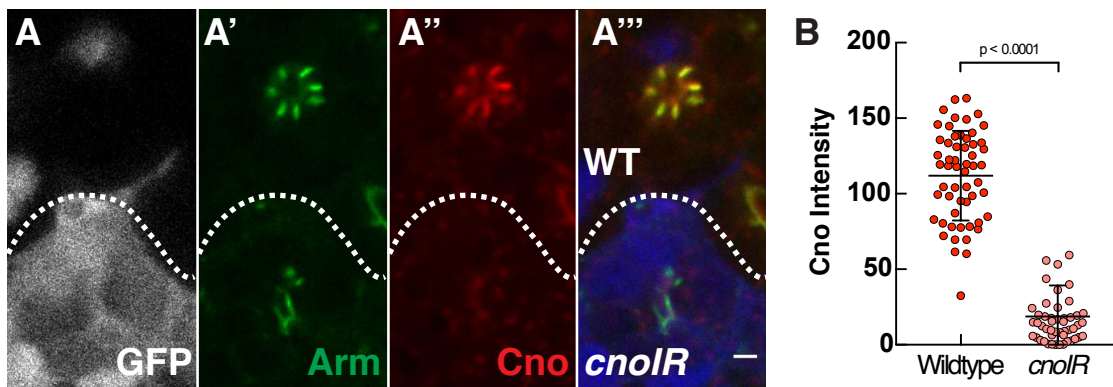

#### Supplementary Figure 4: *cnoIR* abolishes Cno expression

(A-A''') *cnoIR* cells positively labeled by GFP (A) and stained for Arm (A') and Cno (A''). Scale bars = 2 $\mu$ m. (B) Quantification of residual Cno intensity within the ZA, measured along the Arm domain, in *cnoIR* photoreceptors.

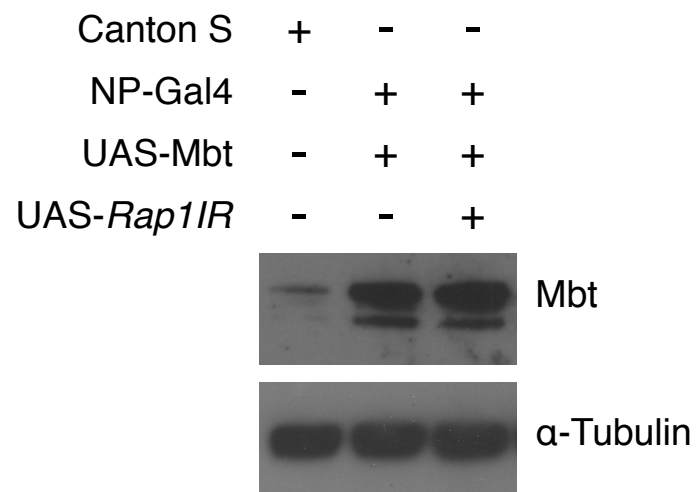

**Supplementary Figure 5: Expression levels of Mbt in *Rap1IR* retinas**

Western blot performed on retinal protein extracts, dissected at 40% after puparium formation.

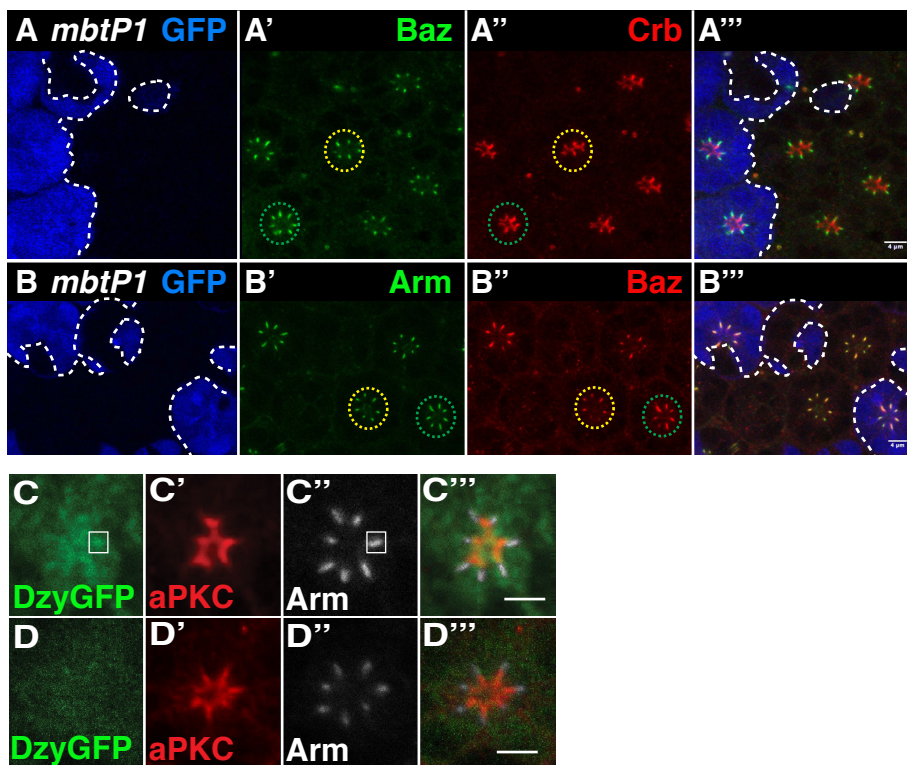

**Supplementary Figure 6: Mbt Regulates the accumulation of Arm, Baz and Dzy at the ZA.** (A-B) *mbt<sup>P1</sup>* mutant cells (lacking of GFP, blue, (A and B)), stained for Baz (A' and B''), Arm (B') and Crb (A''). (C-C''') Dzy::GFP distribution in wild type photoreceptors (C), stained for aPKC (C') and Arm (C''). (D-D''') Dzy::GFP distribution in *mbt<sup>P1</sup>* mutant photoreceptors (D), stained for aPKC (D') and Arm (D''). Scale bars = 2 $\mu$ m.
